# Supplementary material for: Autocrine TGFβ1 Opposes Exogenous TGFβ1-Induced Cell Migration and Growth Arrest through Sustainment of a Feed-Forward Loop Involving MEK-ERK Signaling
Source: MDPI journal article supplement (doi:10.3390/cancers13061357), 2021-03-17

# Uncropped blots: Figure 1C

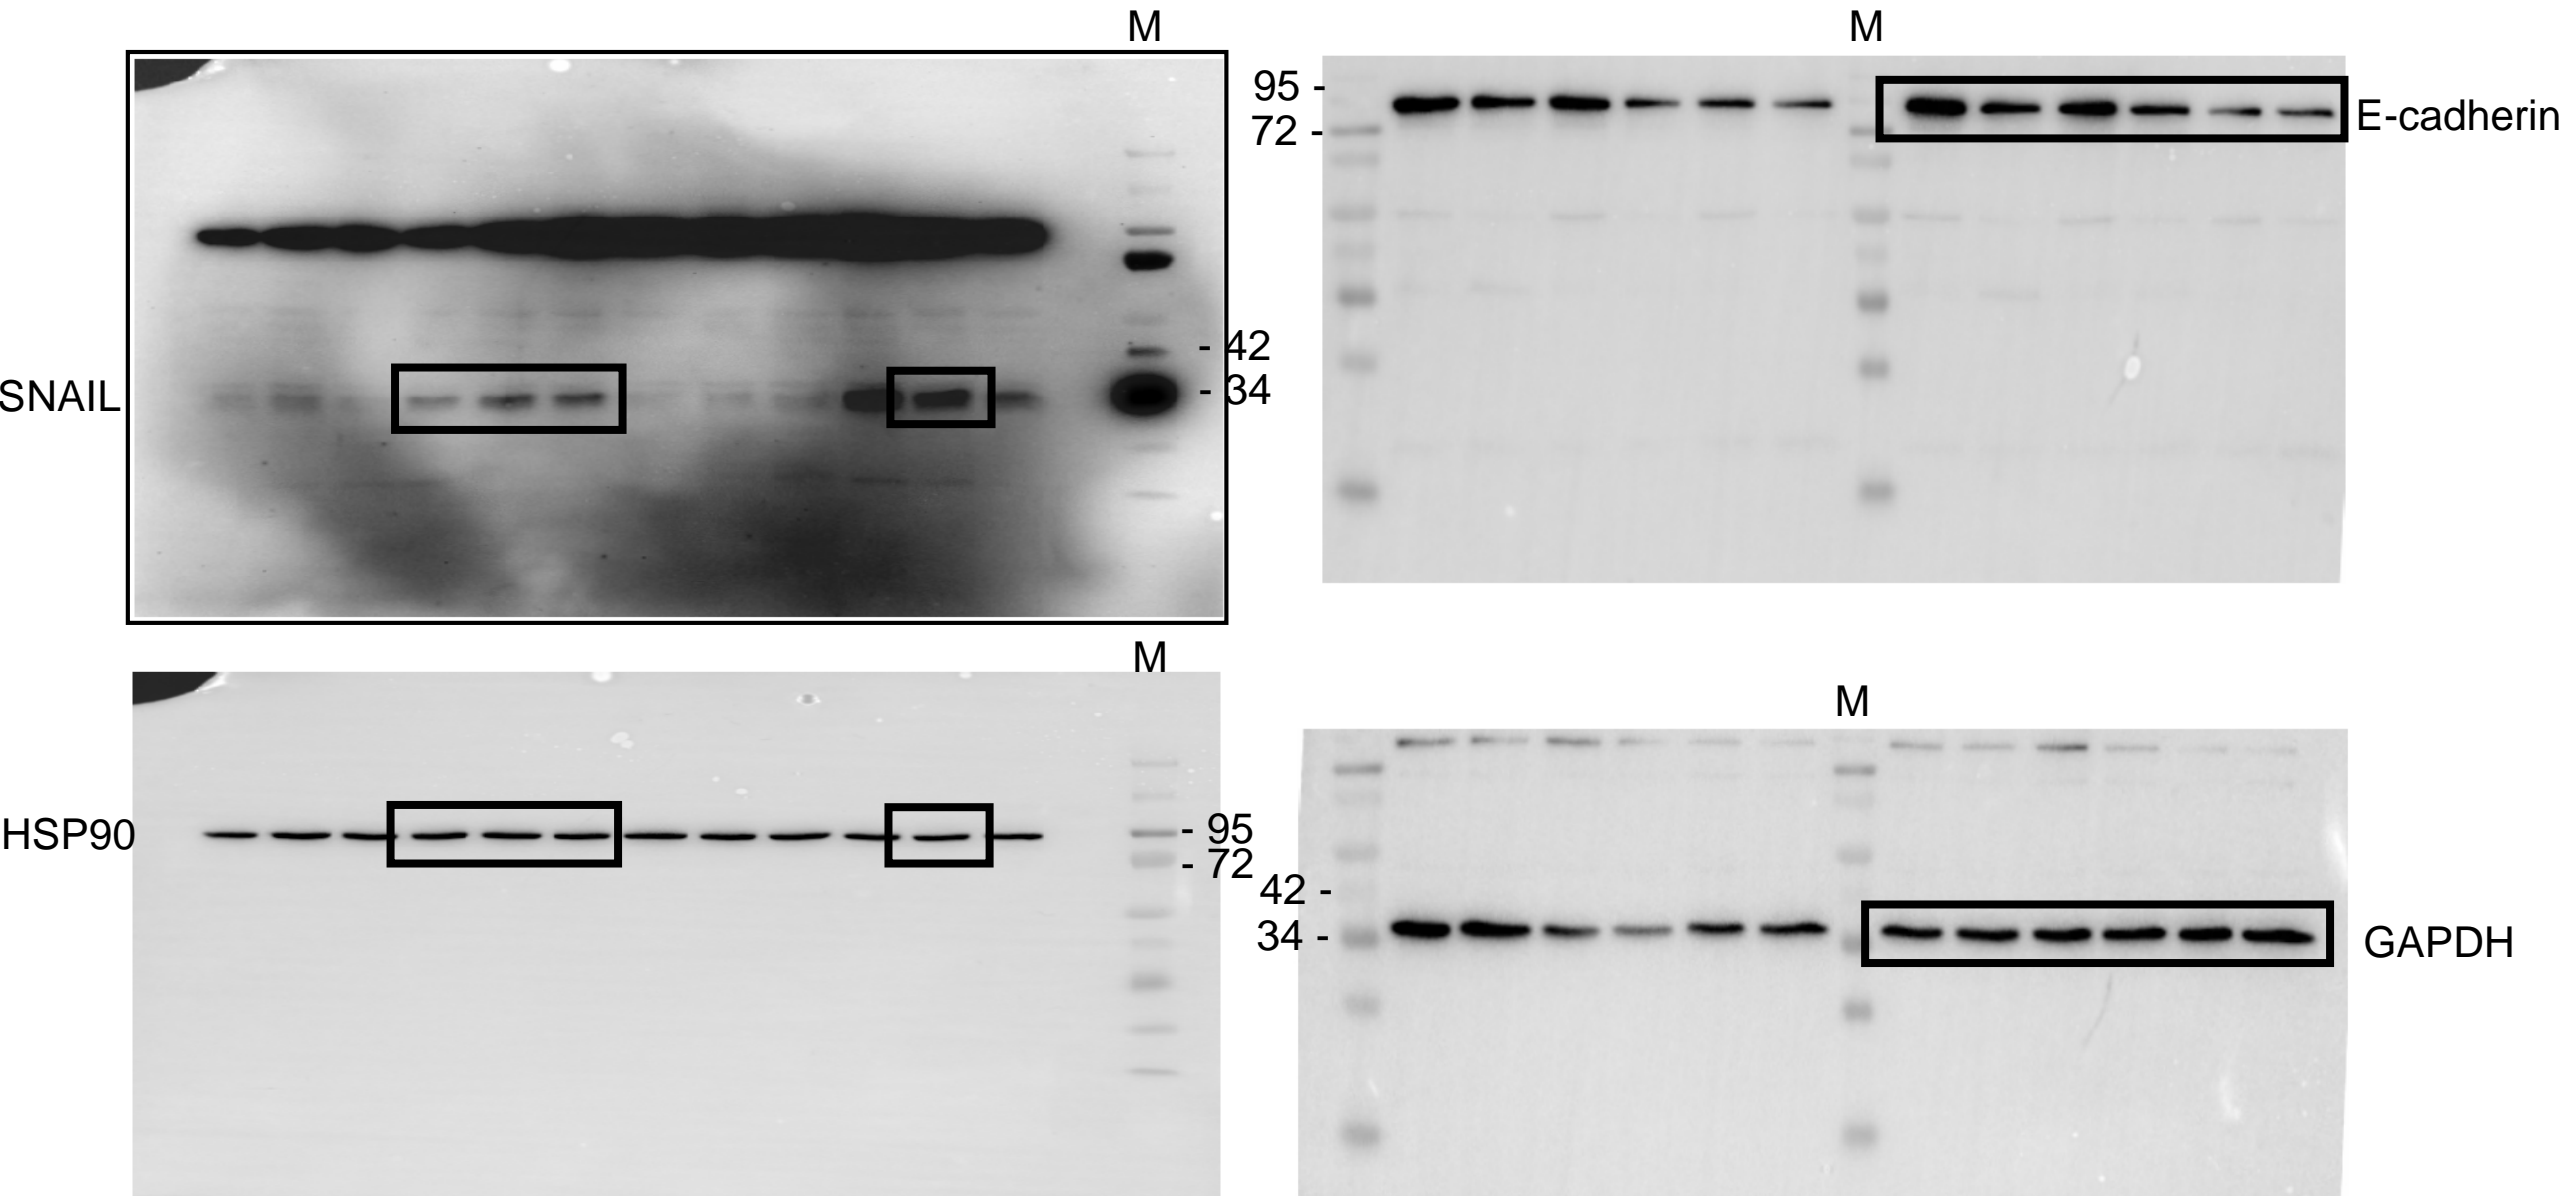

Figure legend: M = molecular weight marker (SM1841, Fermentas/Thermo Fisher Scientific)

# Uncropped blots: Figure 4B

Panc1

M

$\beta$ -actin

- 52

- 42

- 34

- 26

p21<sup>WAF1</sup>

MDA-MB-231

M

34

26

17

p21<sup>WAF1</sup>

42

34

26

17

GAPDH

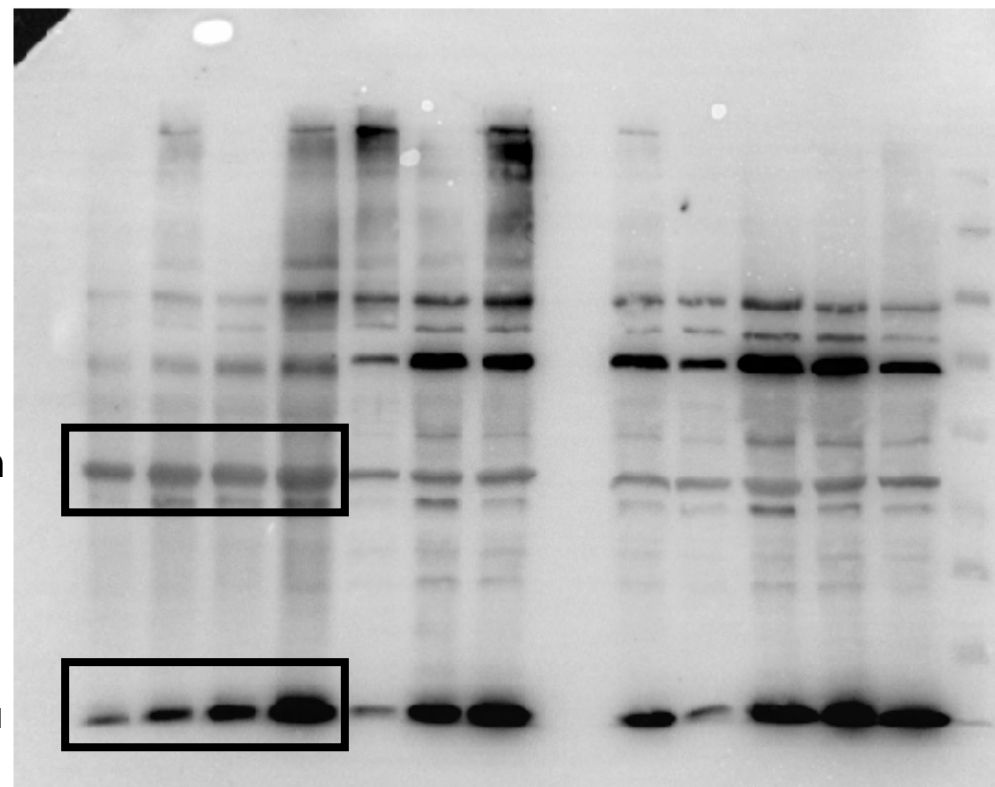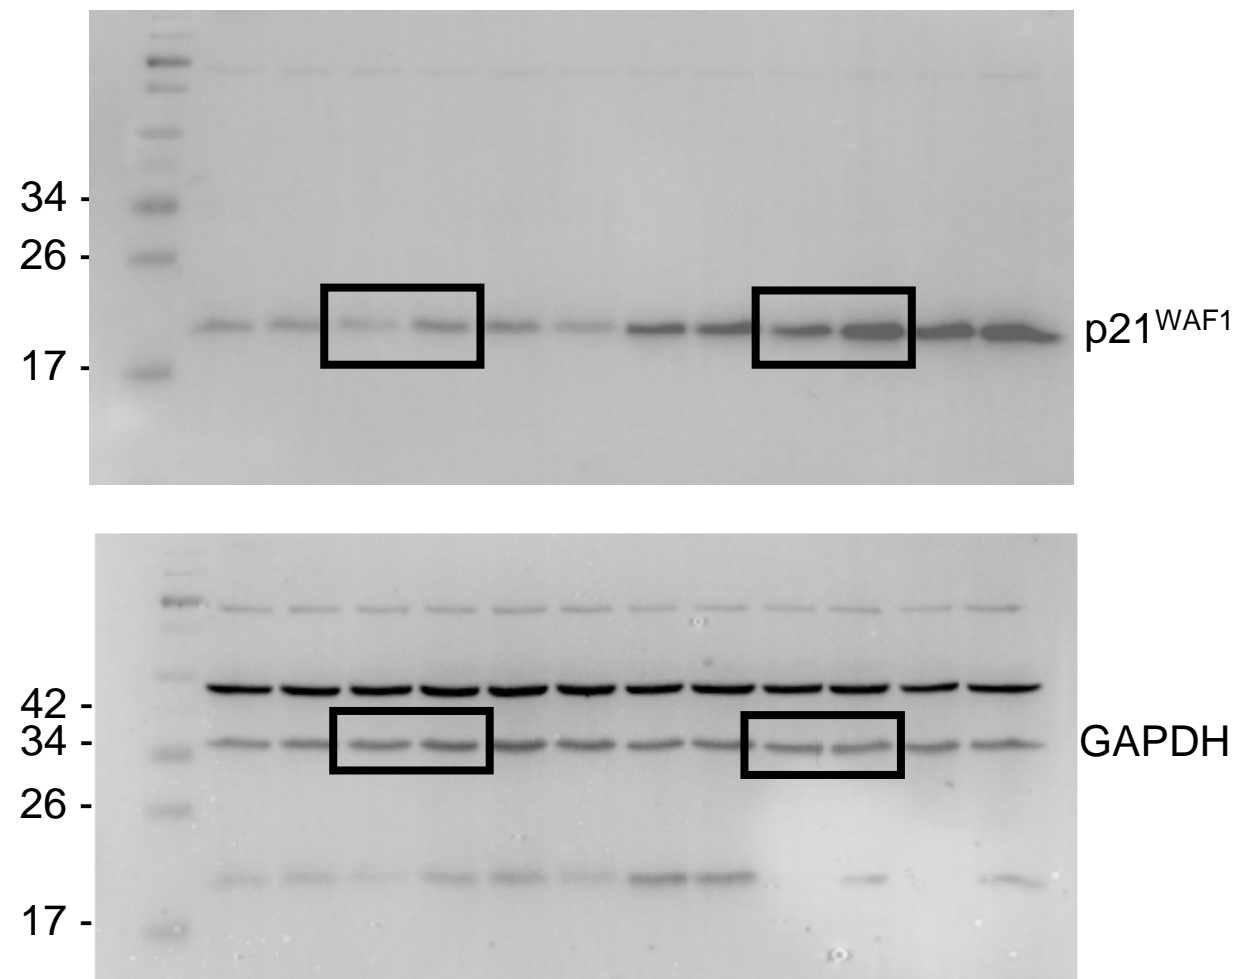

# Uncropped blots: Figure 5D

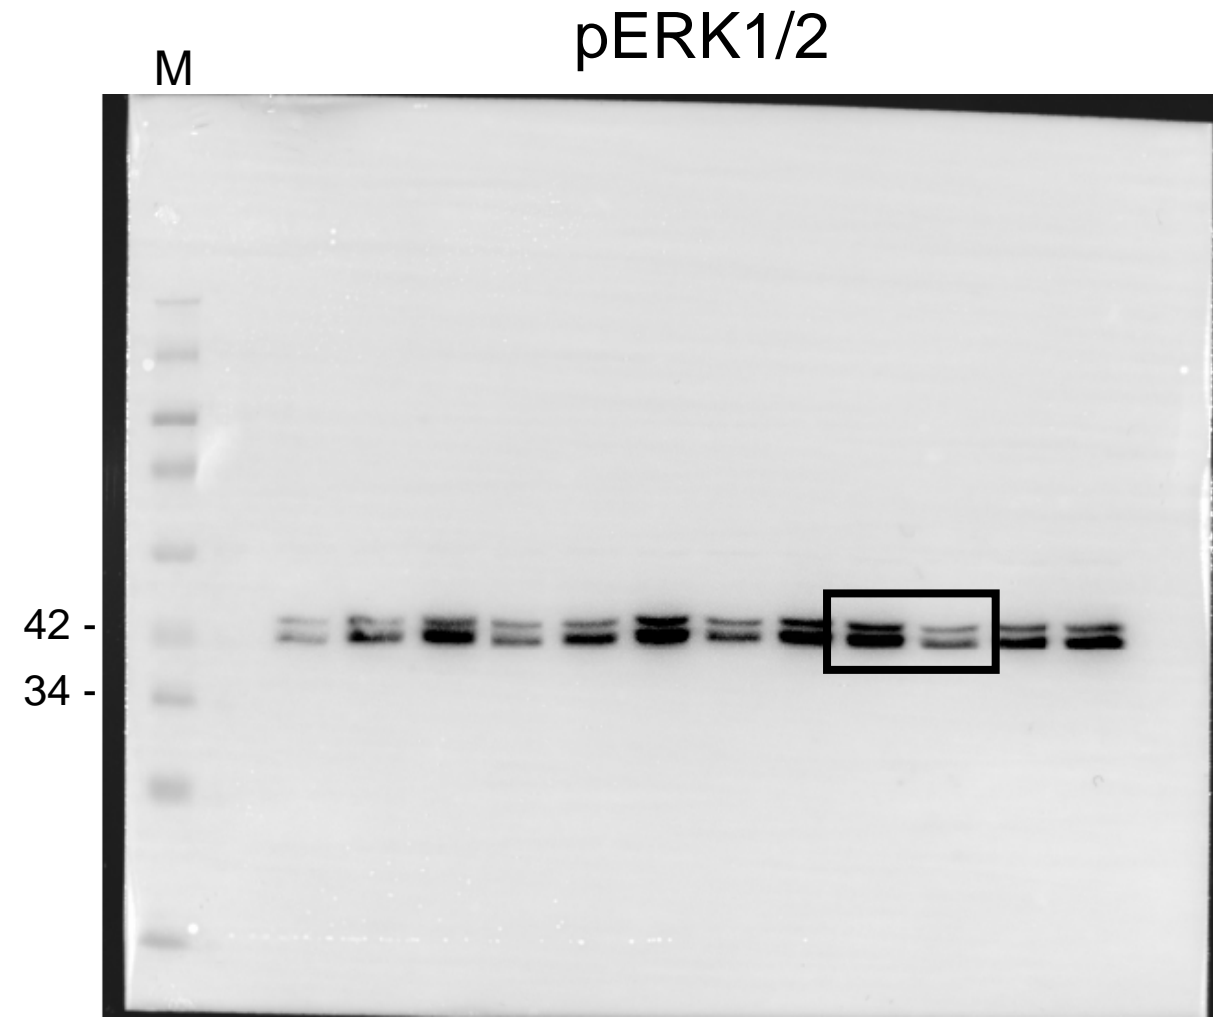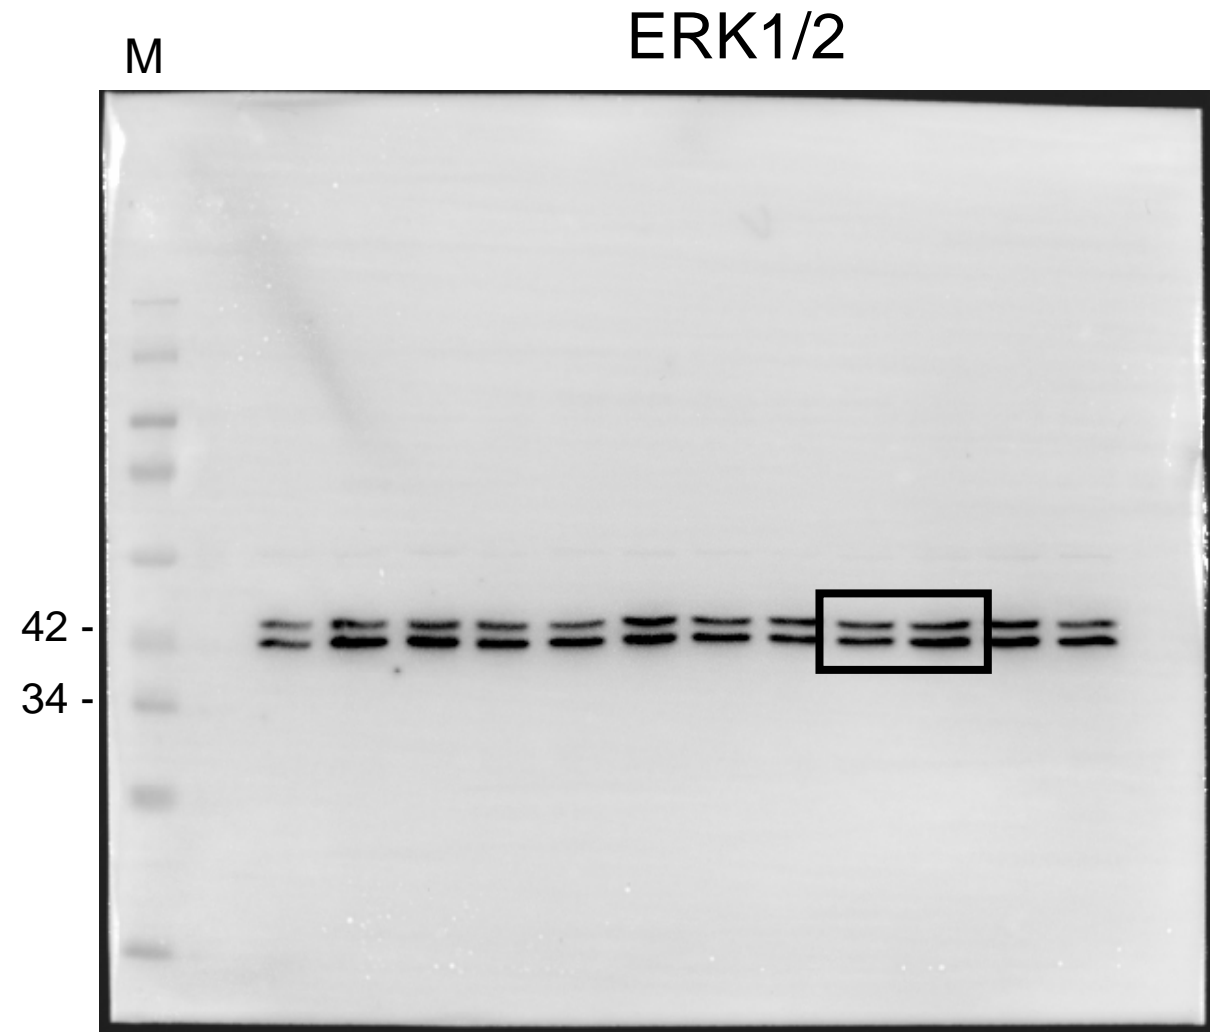

## Uncropped blots: Figure 6B

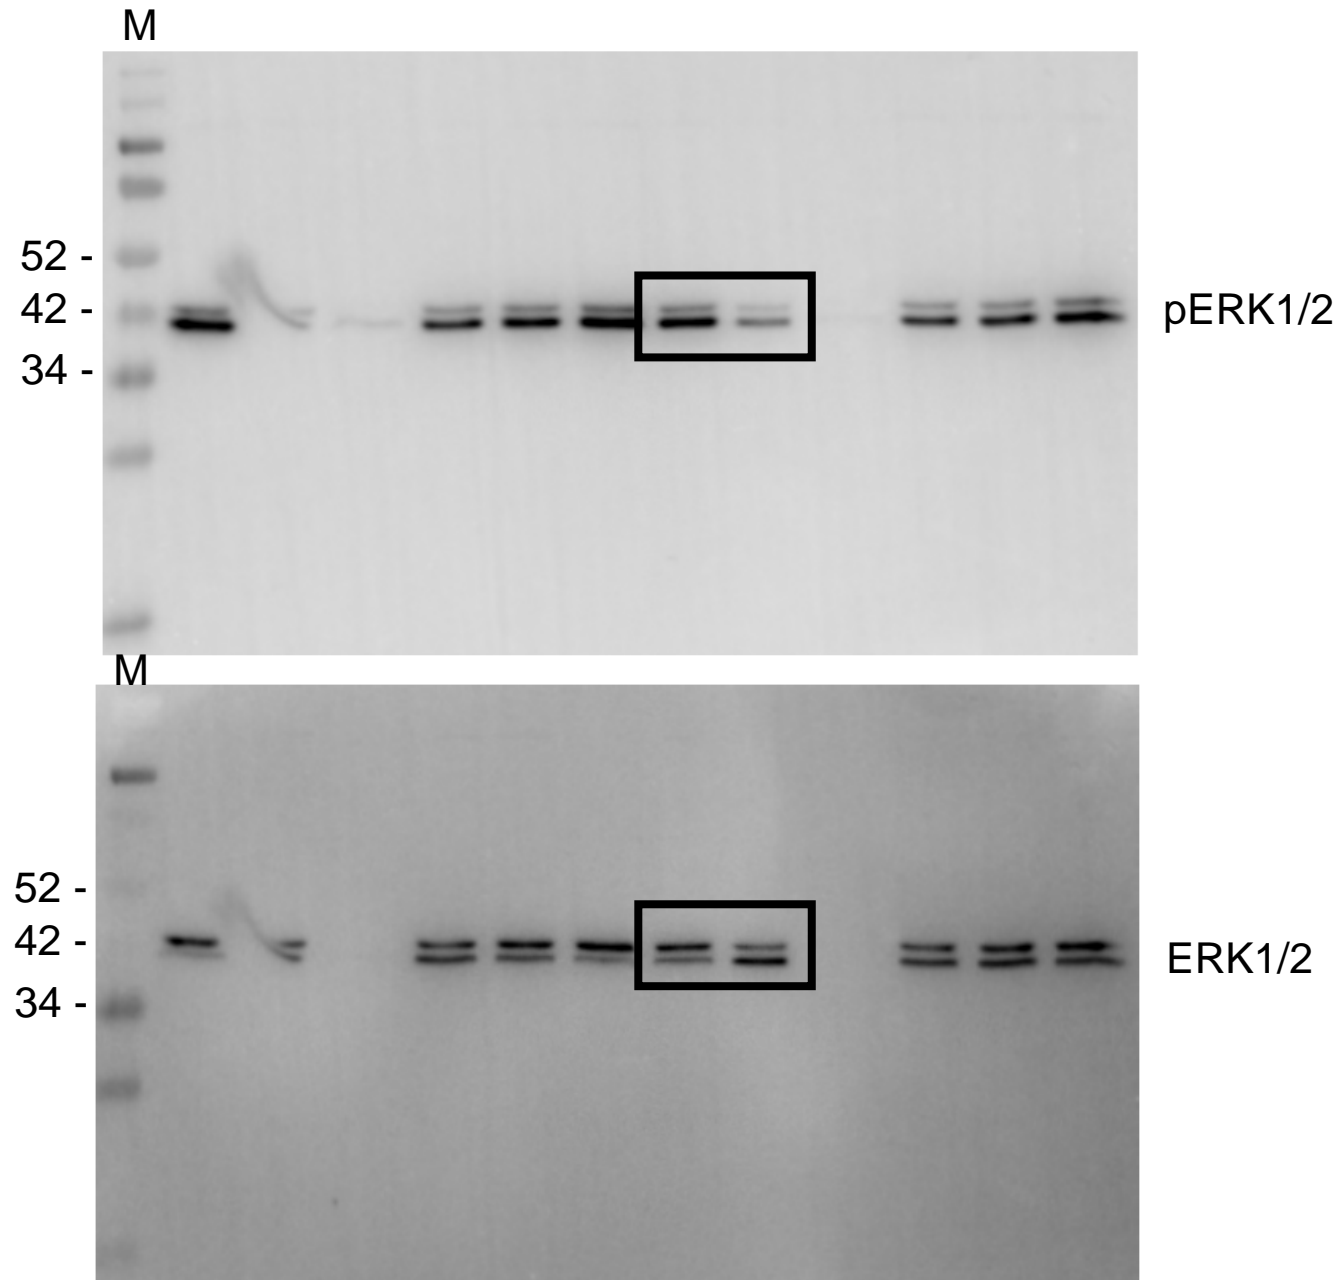

## Uncropped blots: Figure S4

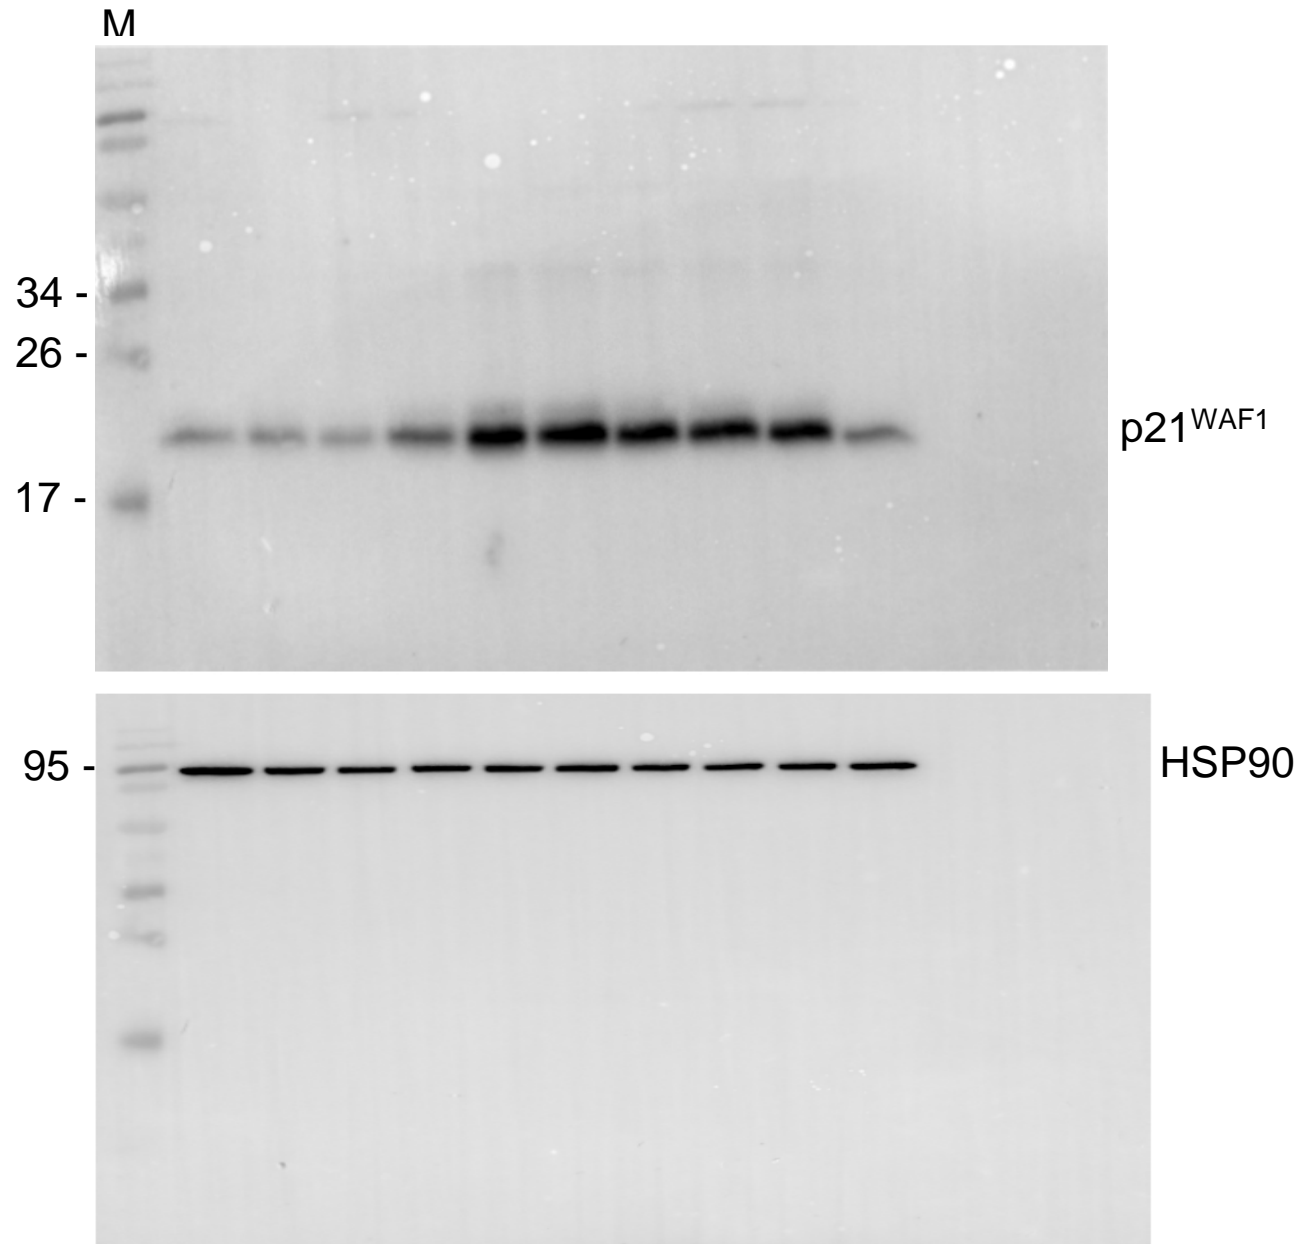

# Uncropped blots: Figure S5

pERK1/2

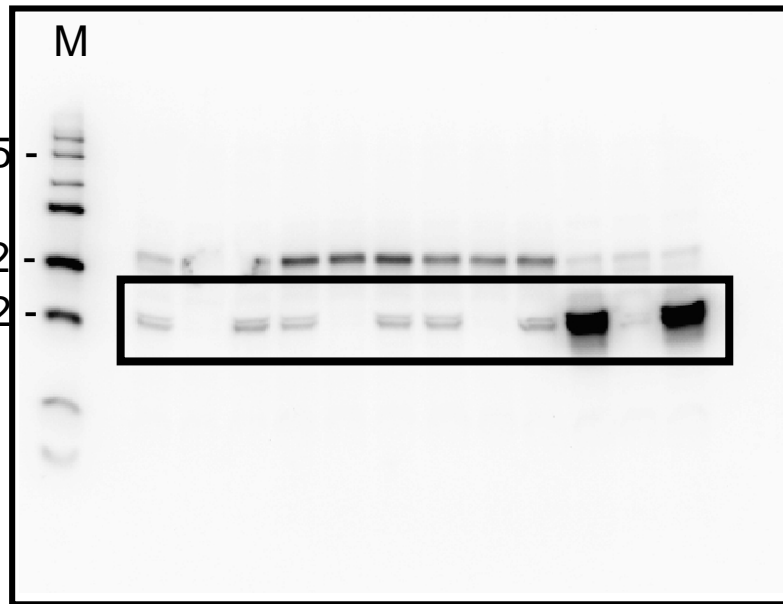

pSMAD3C

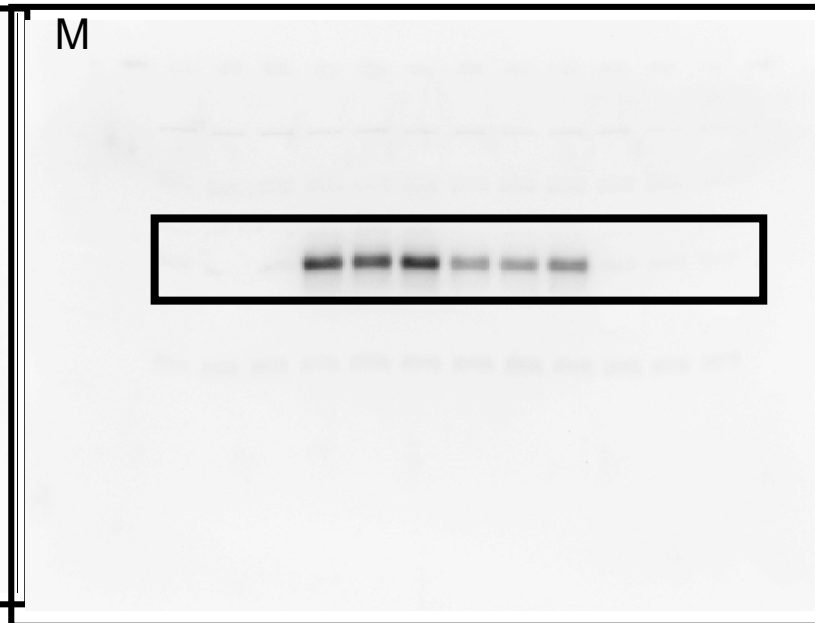

HSP90

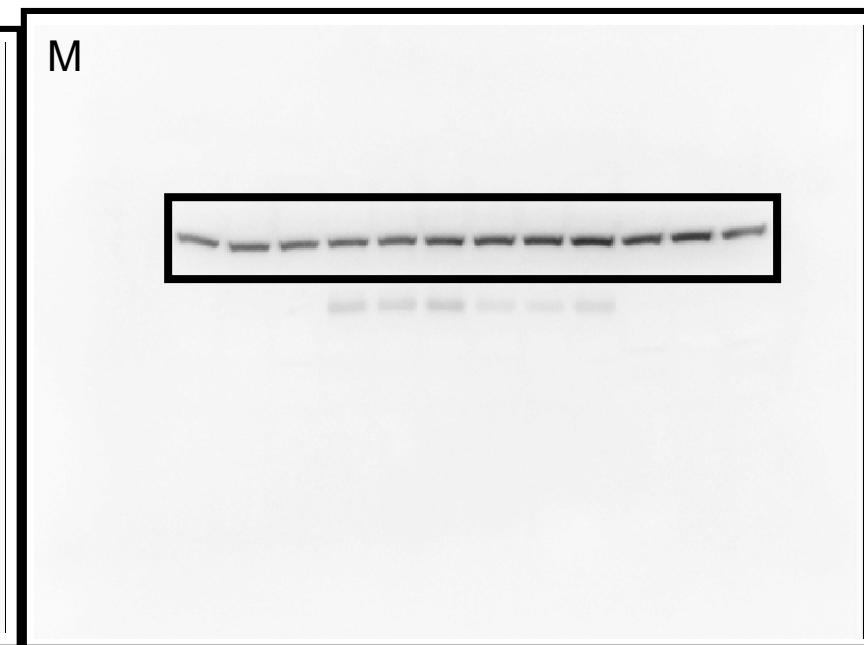

# Uncropped blots: Figure S6

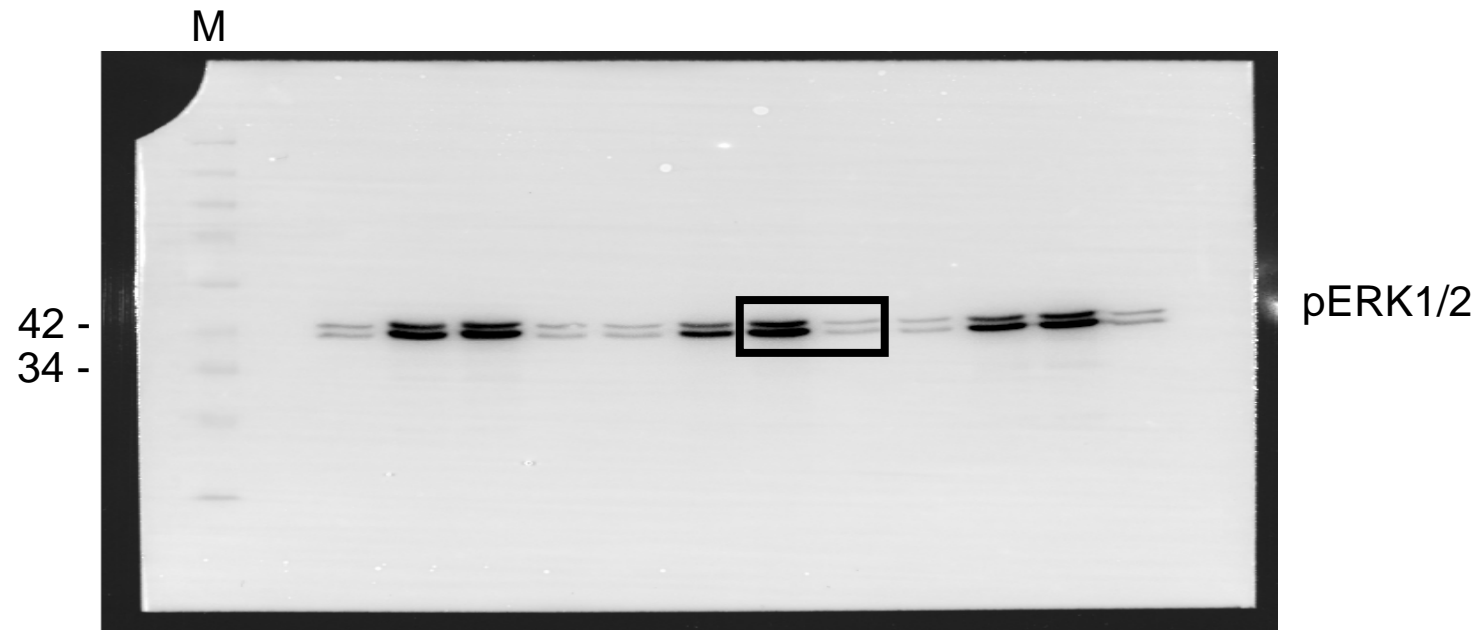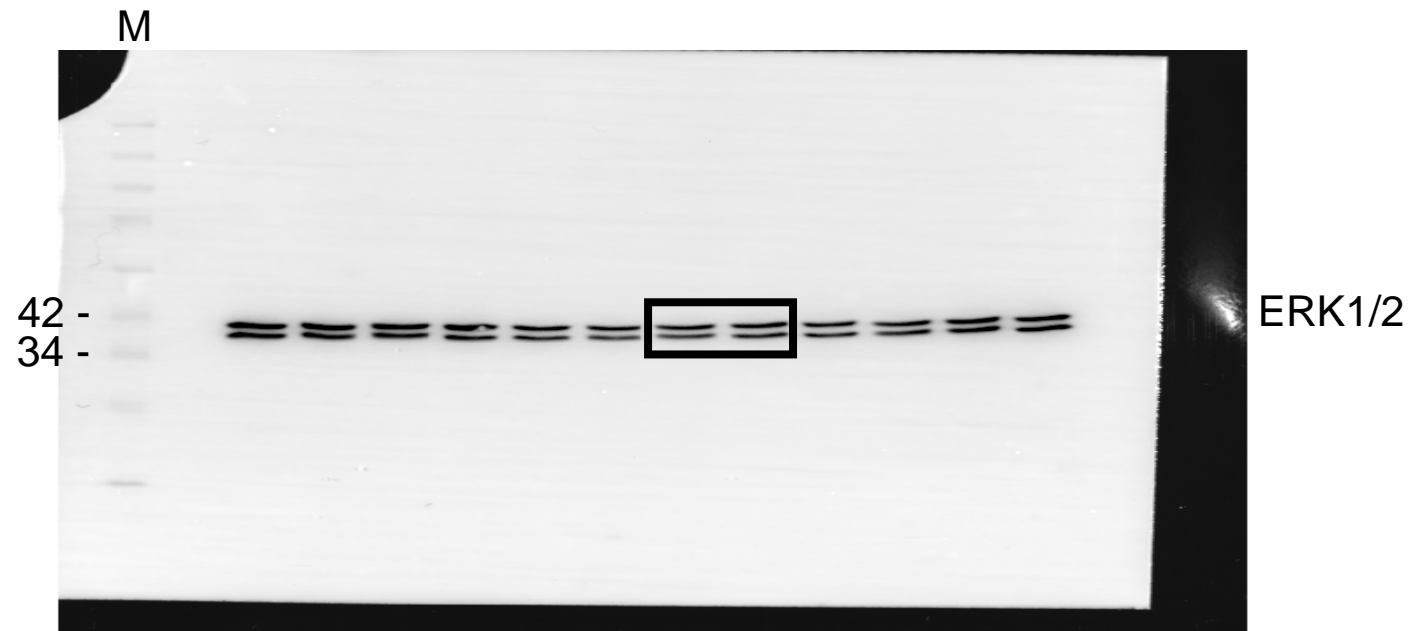

Supplement: s1 [file s1]
